# Supplementary material for: Distinguishing Invasive from Chronic Pulmonary Infections: Host Pentraxin 3 and Fungal Siderophores in Bronchoalveolar Lavage Fluids
Source: MDPI journal article supplement (doi:10.3390/jof8111194), 2022-11-12
Supplement: s1 [file s1]

# Article

## Distinguishing invasive from chronic pulmonary infections: host pentraxin 3 and fungal siderophores in bronchoalveolar lavage fluids

Radim Dobiáš<sup>1,2\*</sup>, Pavla Jaworská<sup>1</sup>, Valeria Skopelidou<sup>2</sup>, Jan Strakoš<sup>2</sup>, Denisa Višňovská<sup>2,3</sup>, Marcela Káňová<sup>4,5,6</sup>, Anton Škríba<sup>7</sup>, Pavlína Lysková<sup>8</sup>, Tomáš Bartek<sup>9</sup>, Ivana Janíčková<sup>9</sup>, Radovan Kozel<sup>10</sup>, Lucie Cwiková<sup>10</sup>, Zbyněk Vrba<sup>11</sup>, Milan Navrátil<sup>12</sup>, Jan Martinek<sup>13,14</sup>, Pavla Coufalová<sup>15</sup>, Eva Krejčí<sup>1,2</sup>, Vít Ulmann<sup>1,16</sup>, Milan Raška<sup>17</sup>, David A. Stevens<sup>18,19</sup> and Vladimír Havlíček<sup>7,20</sup>

<sup>1</sup> Department of Bacteriology and Mycology, National Reference Laboratory for Mycological Diagnostics, Public Health Institute in Ostrava, 702 00 Ostrava, Czechia

<sup>2</sup> Institute of Laboratory Medicine, Faculty of Medicine, University of Ostrava, 703 00 Ostrava, Czechia

<sup>3</sup> Department of Biology and Ecology, Faculty of Science, University of Ostrava, 710 00 Ostrava, Czechia

<sup>4</sup> Department of Anesthesiology and Intensive Care Medicine, University Hospital Ostrava, 708 00 Ostrava

<sup>5</sup> Institute of Physiology and Pathophysiology, Faculty of Medicine, University of Ostrava, 710 00 Ostrava, Czechia

<sup>6</sup> Department of Intensive Medicine, Emergency Medicine and Forensic Studies, University of Ostrava, 710 00 Ostrava, Czechia

<sup>7</sup> Institute of Microbiology of the Czech Academy of Sciences, 142 20 Prague, Czechia

<sup>8</sup> Department of Medical Microbiology Prague and Kladno, Public Health Institute in Ústí nad Labem, 186 00 Prague, Czech Republic

<sup>9</sup> Department of Lung Disease and Tuberculosis, University Hospital Ostrava, 708 00 Ostrava, Czechia

<sup>10</sup> Department of Pneumology and Phthisiology, Ostrava City Hospital, 728 80 Ostrava, Czech Republic

<sup>11</sup> Lung Department, Krnov Combined Medical Facility, 794 01 Krnov, Czech Republic

<sup>12</sup> Department of Hemato-oncology, University Hospital of Ostrava, 708 00 Ostrava, Czechia

<sup>13</sup> Department of Immunology, Public Health Institute in Ostrava, 702 00 Ostrava, Czechia

<sup>14</sup> Department of Epidemiology and Public Health, Faculty of Medicine, University of Ostrava, 70030 Ostrava, Czech Republic

<sup>15</sup> Department of Clinical Biochemistry, AGEL Hornická poliklinika s.r.o., 702 00 Ostrava, Czechia

<sup>16</sup> Department of Microbiology, Faculty of Medicine and Dentistry, Palacký University Olomouc, 775 15 Olomouc, Czechia

<sup>17</sup> Department of Immunology, Faculty of Medicine and Dentistry, Palacký University Olomouc, 775 15 Olomouc, Czechia

<sup>18</sup> California Institute for Medical Research, 2260 Clove Dr., San Jose, CA 95128, USA

<sup>19</sup> Division of Infectious Diseases and Geographic Medicine, Stanford University School of Medicine, Stanford, CA 95128, USA

<sup>20</sup> Department of Analytical Chemistry, Faculty of Science, Palacký University, 771 46 Olomouc, Czechia

\* Correspondence: radim.dobias@zuova.cz

## Supplementary Data S1: Pentraxin 3 median concentration, cut-off, and Receiver Operating Characteristic analysis

### S1.1. PTX3 median concentrations:

| Ptx3 (pg/mL) |      |
|--------------|------|
| <b>IPA</b>   | 4613 |
| <b>CPA</b>   | 1746 |
| <b>IPM</b>   | 4326 |
| <b>FCol</b>  | 242  |
| <b>BInf</b>  | 224  |

PTX3, pentraxin 3; IPA, Invasive Pulmonary Aspergillosis; CPA, Chronic Pulmonary Aspergillosis (including one patient with SAIA – Sub Acute Invasive Aspergillosis); IPM, Invasive Pulmonary Mucormycosis; Fcol, Fungal Colonization; BInf, pulmonary Bacterial Infections

### S1.2. Receiver Operating Characteristic analysis:

Optimal cut-off for invasive fungal disease (in our case aspergillosis and mucormycosis)  
= **1653 pg/mL**, giving an area under the curve (AUC) of 0.9795

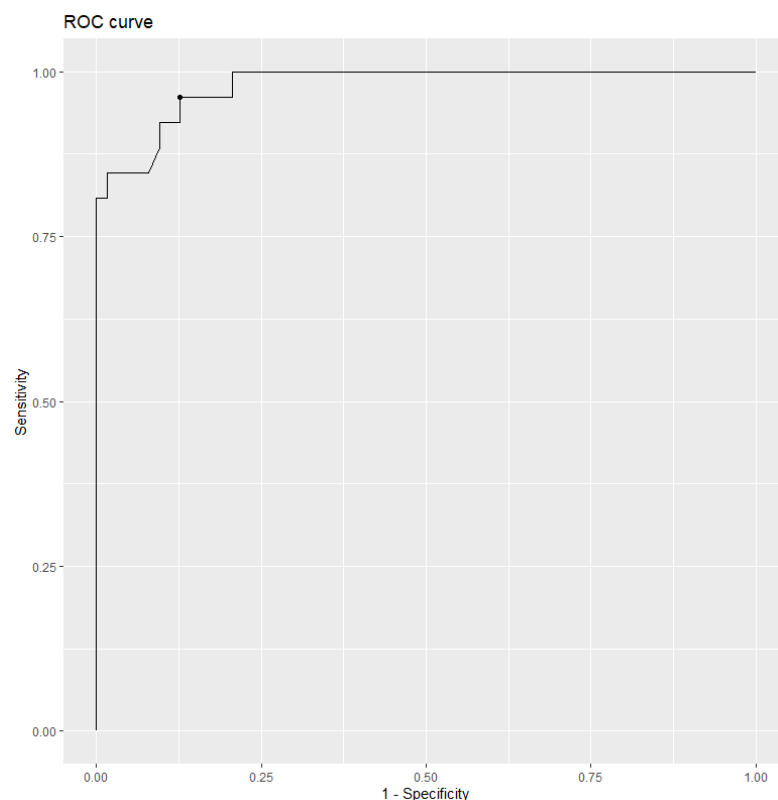

Optimal cut-off for invasive pulmonary aspergillosis = **2545 pg/mL**, giving an area under the curve (AUC) of 0.9991

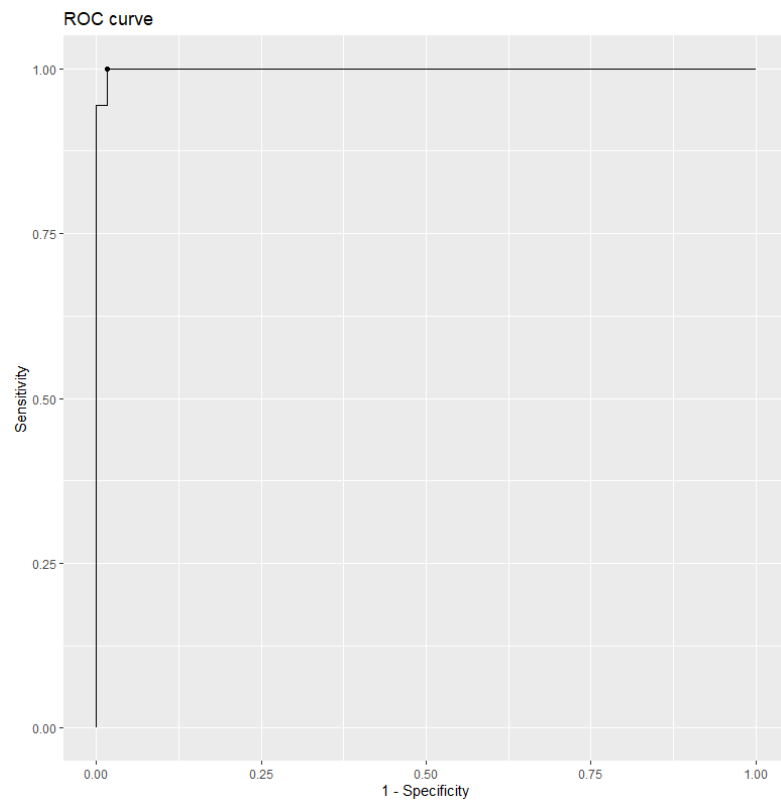

**Supplementary Data S2: Pentraxin 3, triacetylfusarinin C (TafC) and ferricrocin (Fc) concentrations in bronchoalveolar lavage fluid from invasive pulmonary aspergillosis and invasive pulmonary mucormycosis patients**

**S2.1. Pentraxin 3, triacetylfusarinin C (TafC) and ferricrocin (Fc) concentrations in bronchoalveolar lavage fluid**

| IPA<br>Patient no. | Ptx3<br>(pg/mL) | TafC/Crea<br>(ratio) | Fc/Crea<br>(ratio) |
|--------------------|-----------------|----------------------|--------------------|
| 1                  | 4733            | ND                   | 58.8               |
| 2                  | 5000            | 72.7                 | ND                 |
| 3                  | 2545            | 370                  | 18.3               |
| 4                  | 5000            | 17.8                 | ND                 |
| 5                  | 4932            | 17.8                 | ND                 |
| 6                  | 4909            | 0.3                  | ND                 |
| 7                  | 4220            | ND                   | ND                 |
| 8                  | 4639            | ND                   | ND                 |
| 9                  | 4330            | 172.1                | 19.7               |
| 10                 | 3902            | ND                   | ND                 |
| 11                 | 4942            | ND                   | ND                 |
| 12                 | 4547            | ND                   | ND                 |
| 13                 | 4897            | 102.6                | 16.7               |
| 14                 | 4880            | 34.4                 | ND                 |
| 15                 | 3496            | 0.3                  | ND                 |
| 16                 | 4588            | 209.6                | 36.2               |
| 17                 | 4544            | ND                   | ND                 |
| 18                 | 4116            | 194.1                | ND                 |
| IPM<br>Patient no. | Ptx3<br>(pg/mL) | TafC/Crea<br>(ratio) | Fc/Crea<br>(ratio) |
| 1                  | 1653            | ND                   | ND                 |
| 2                  | 4352            | ND                   | ND                 |
| 3                  | 4300            | ND                   | ND                 |
| 4                  | 4920            | ND                   | ND                 |

**S2.2. Diagnostic values of triacetylfusarinin C (TafC) and ferricrocin (Fc)**

| 95% CI                 | TafC/IPM | TafC/IPA | Fc/IPA |
|------------------------|----------|----------|--------|
| <b>Sensitivity (%)</b> | 2        | 61       | 0      |
| <b>Specificity (%)</b> | 100      | 98       | 100    |
| <b>PPV (%)</b>         | 100      | 92       | 0      |
| <b>NPV (%)</b>         | 7        | 90       | 22     |

IPA, Invasive Pulmonary Aspergillosis; IPM, Invasive Pulmonary Mucormycosis; Ptx3, Pentraxin 3; TafC, triacetylfusarinin C; Fc, ferricrocin; Crea, Creatinine; ND, not detected; PPV, Positive Predictive Value; NPV, Negative Predictive Value

**Supplementary Data S3: Pentraxin 3 concentrations and galactomannan index values in bronchoalveolar lavage fluid samples from invasive pulmonary aspergillosis patients and analysis of the correlation between the two markers**

| Patient no. | Ptx3<br>(pg/mL) | GM<br>(Positivity index) |
|-------------|-----------------|--------------------------|
| 1           | 4733            | 6.5                      |
| 2           | 5000            | 7.20                     |
| 3           | 2545            | 6.80                     |
| 4           | 5000            | 7.60                     |
| 5           | 4932            | 7.60                     |
| 6           | 4909            | 2.44                     |
| 7           | 4220            | 4.17                     |
| 8           | 4639            | 8.30                     |
| 9           | 4330            | 9.40                     |
| 9           | 3902            | 1.26                     |
| 10          | 4942            | 0.53                     |
| 11          | 4547            | 0.85                     |
| 12          | 3902            | 1.26                     |
| 13          | 4942            | 0.53                     |
| 14          | 4547            | 0.85                     |
| 15          | 4897            | 8.41                     |
| 16          | 4588            | 6.58                     |
| 17          | 4544            | 0.61                     |
| 18          | 4116            | 0.42                     |

|             | Ptx3       | GM         |
|-------------|------------|------------|
| <b>Ptx3</b> | 1.00000000 | 0.09411124 |
| <b>GM</b>   | 0.09411124 | 1.00000000 |

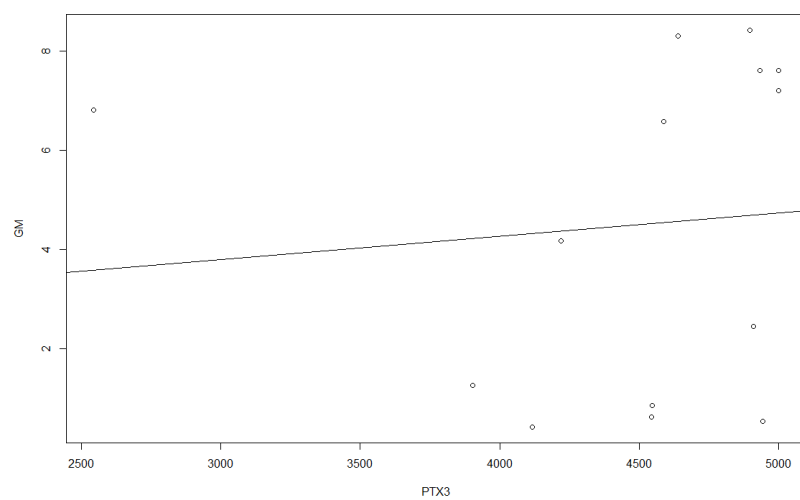

**Pearson's correlation between PTX3 and GM in BALF:**

**Linear association = 0.09411124**

PTX3, pentraxin 3; GM, galactomannan

Supplementary Data S4: Correlation between galactomannan index values and concentrations of ferricrocin and triacetylfusarinine C in invasive pulmonary aspergillosis patients

|      | GM        | Fc        | TafC      |
|------|-----------|-----------|-----------|
| GM   | 1.0000000 | 0.4428115 | 0.4459824 |
| Fc   | 0.4428115 | 1.0000000 | 0.6736457 |
| TafC | 0.4459824 | 0.6736457 | 1.0000000 |

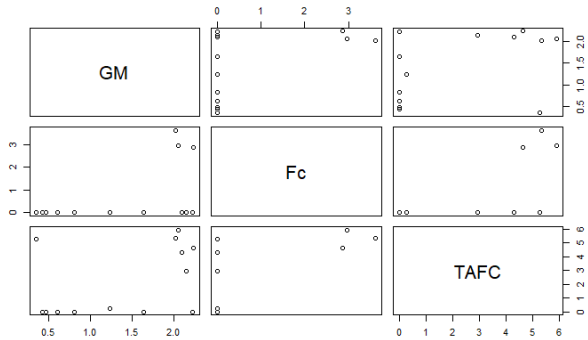

**Pearson’s correlation analysis for GM and Fc in BALF:**  
Linear association = 0.4428115

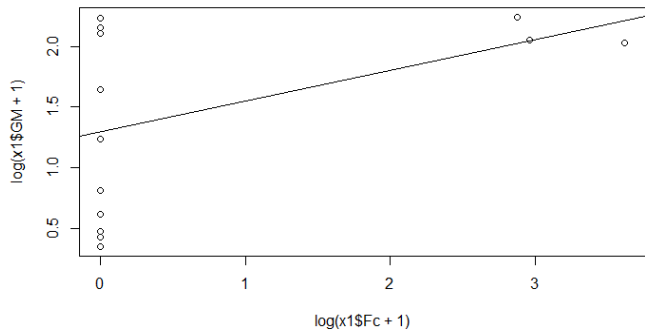

**Pearson’s correlation analysis for GM and TafC in BALF:**  
Linear association = 0.4459824

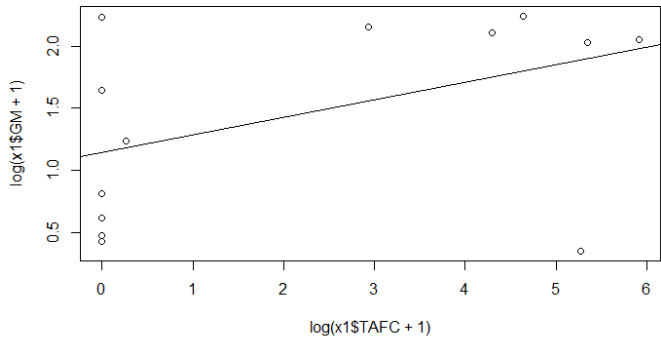

PTX3, pentraxin 3; GM, galactomannan; Fc, ferricrocin; TafC, triacetylfusarinine C
